# Supplementary material for: One-step fabrication and characterization of a poly(vinyl alcohol)/silver hybrid nanofiber mat by electrospinning for multifunctional applications
Source: Royal Society of Chemistry journal article supplement (doi:10.1039/c6ra26770j), 2017-01-01
Supplement: c6ra26770j1.pdf [file c6ra26770j1.pdf]

## Supplementary Material

# One-Step Fabrication and Characterization of Poly(vinyl alcohol)/Silver Hybrid Nanofiber Mat by Electrospinning for Multifunctional Applications

Chun-Gang Yuan\*, Shiwei Guo, Jian Song, Can Huo, Yukai Li, Bing Gui, Xianmei Zhang

School of Environmental Science & Engineering, North China Electric Power University, Baoding 071000, China

Corresponding author: Chun-Gang Yuan  
Tel: +86-312-7525512  
Fax: +86-312-7525512  
Email: chungangyuan@hotmail.com

## Figure captions

Figure S1 Photo images of the prepared fiber mat (a) before and (b) after thermal treatment

Figure S2 EDS spectra of the composite mat at (a) square area and (b) microsphere spots

Figure S3 ATR-FTIR spectra of initial and thermal treated Ag-PVA mat

Figure S4 Effect of temperature on the adsorption efficiency ( $C_0=20\text{ng/mL}$ ,  $V=50\text{ mL}$ ,  $m=50\text{mg}$ )

Figure S5 Effect of coexisting ions on the adsorption efficiency ( $V=50\text{mL}$ ,  $m=50\text{mg}$ ,  $25^\circ\text{C}$ )

Figure S6 Regeneration and recovery of the used mat ( $V=50\text{mL}$ ,  $m=50\text{mg}$ ,  $C(\text{HCl and HNO}_3)=10\%$  (v/v),  $V(\text{HCl and HNO}_3)= 5.0\text{mL}$ ,  $25^\circ\text{C}$ )

Figure S7 Silver release from the mat during use ( $V=50\text{mL}$ ,  $m=50\text{mg}$ ,  $25^\circ\text{C}$ )

Figure S8 A.pseudo-first-order dynamic equation; B.pseudo-second-order equation ( $V=50\text{mL}$ ,  $m=50\text{mg}$ ,  $25^\circ\text{C}$ )

Table S1 Mass composition of the elements in the mat from EDS analysis

| Element | [wt.%] Square region | [wt.%] Micorsphere |
|---------|----------------------|--------------------|
| C       | 76.1                 | 81.2               |
| O       | 18.2                 | 13.4               |
| Ag      | 5.67                 | 5.43               |
| Total   | 100                  | 100                |

Table S2 Mass composition of the elements in the mat from XPS analysis

| Element | Content (wt%) |
|---------|---------------|
| C1s     | 87.2          |
| O1s     | 8.36          |
| Ag3d    | 4.31          |
| Hg4f    | 0.100         |

Table S3. Comparison with other reports

| Composition abbreviate | Station   | Maximum adsorption capacity | Optimal PH | Reference  |
|------------------------|-----------|-----------------------------|------------|------------|
| Ag-PVA FM              | mat       | 229mg/g                     | 6~8        | This study |
| SWCNT-SH               | powders   | 131 mg/g                    | 9          | [S1]       |
| PGCP-COOH              | particles | 13.73mg/g                   | 6~8        | [S2]       |
| PANI-PA/CA             | membrane  | 280.11mg/g                  | 5          | [S3]       |
| WS-AC                  | powders   | 151.5mg/g                   | 2          | [S4]       |
| Cys-Fe3O4 MNPs         | particles | 380 mg/mol                  | 5          | [S5]       |
| T-MSNC                 | particles | 19.79mg/g                   | no test    | [S6]       |
| Na2S2O3/Mn             | particles | 64 mg/mg                    | 3~7        | [S7]       |
| MnO2/CNT               | particles | 58.8mg/g                    | 7          | [S8]       |
| A336-MTBA-PVA/IL       | beads     | 49.89mg/g                   | 5          | [S9]       |

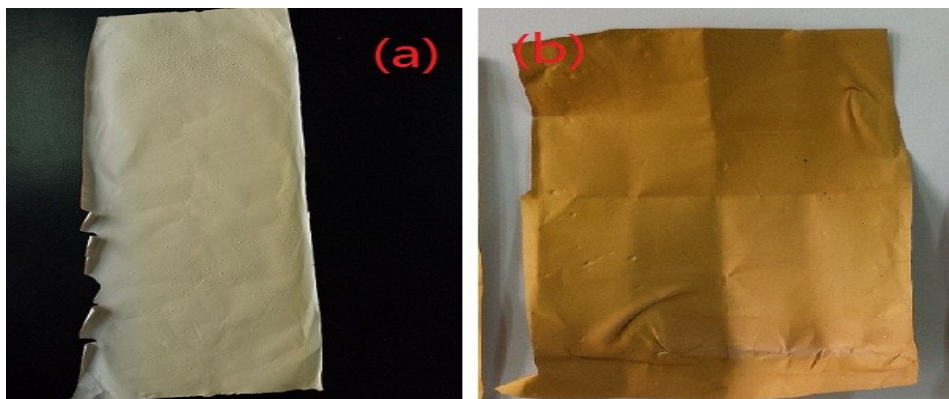

Figure S1 Photo images of the prepared fiber mat (a) before and (b) after thermal treatment

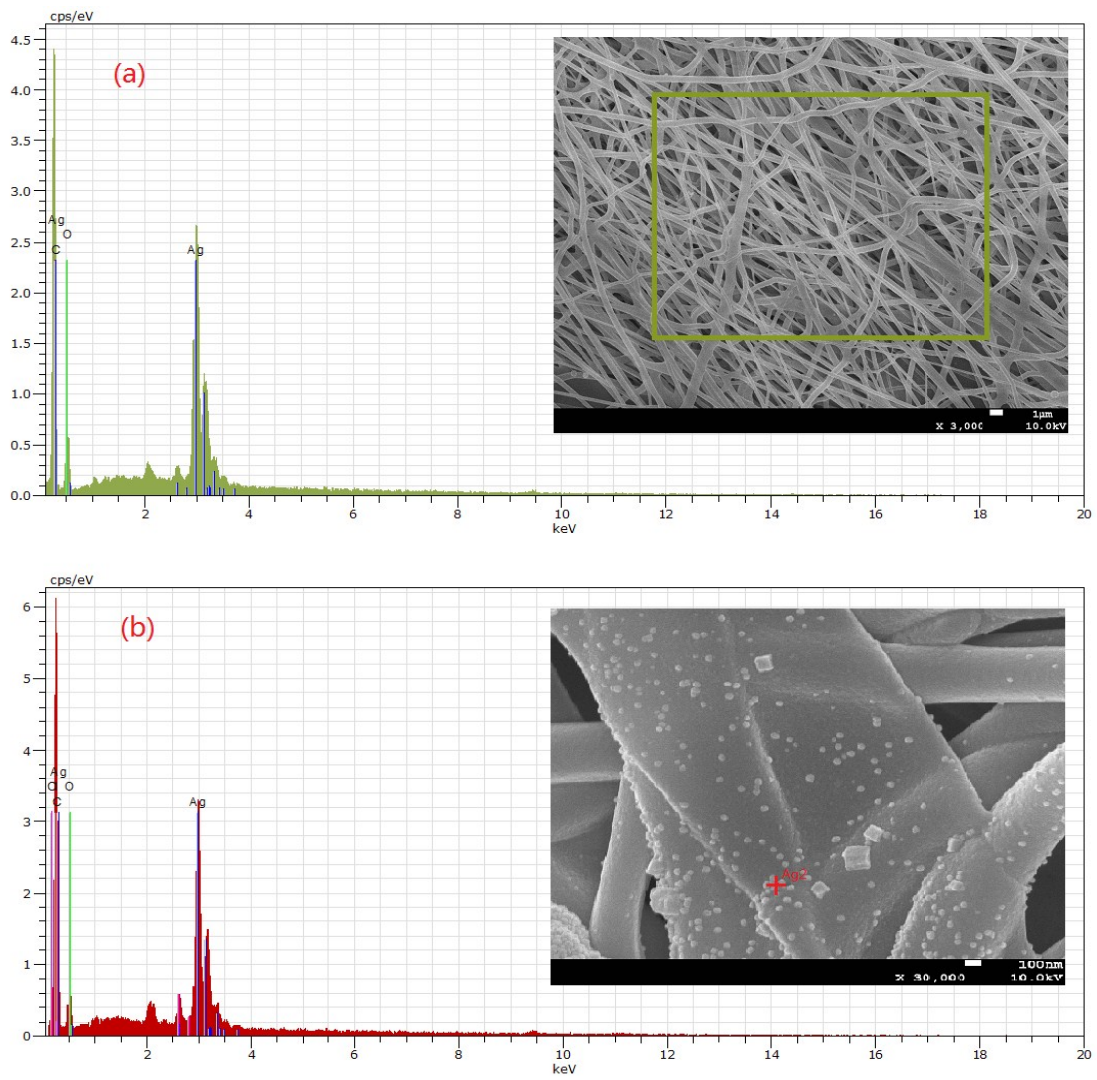

Figure S2 EDS spectra of the composite mat at (a) square area and (b) microsphere spots

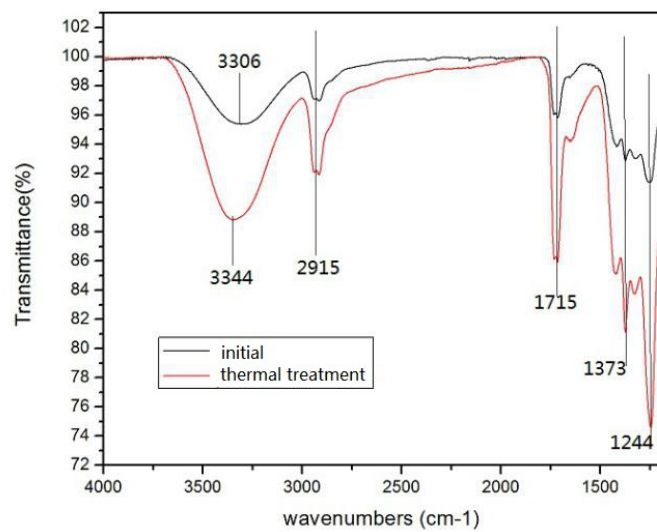

Figure S3 ATR-FTIR spectra of initial and thermal treated Ag-PVA mat

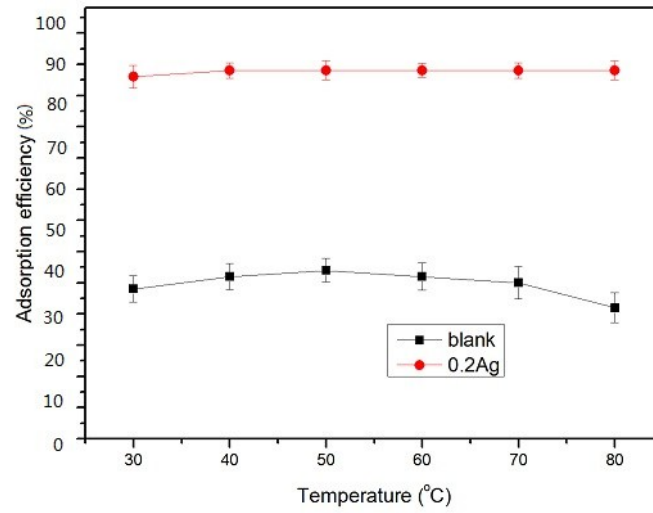

Figure S4 Effect of temperature on the adsorption efficiency ( $C_0=20\text{ng/mL}$  ,  $V=50\text{ mL}$ ,  $m=50\text{mg}$ )

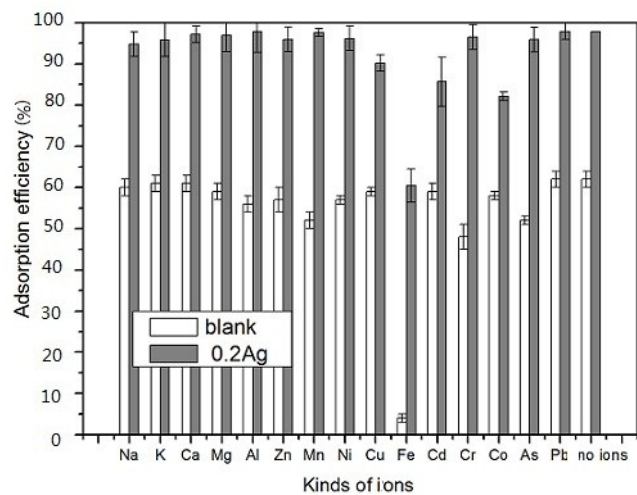

Figure S5 Effect of coexisting ions on the adsorption efficiency (V=50mL, m=50mg, 25 °C)



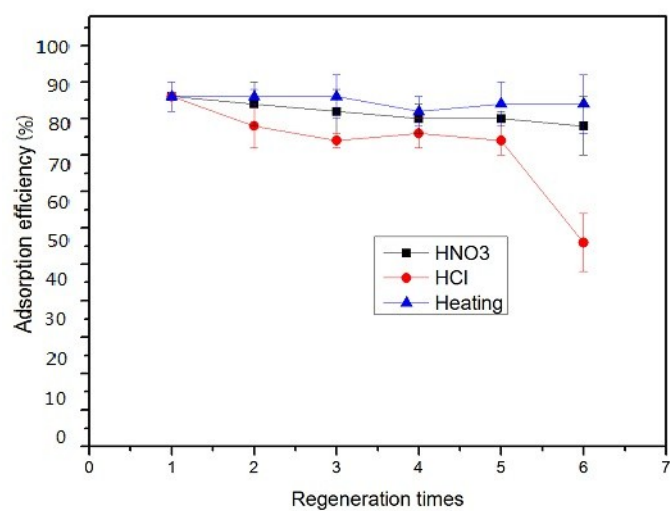

Figure S6 Regeneration and recovery of the used mat ( $V=50\text{mL}$ ,  $m=50\text{mg}$ ,  $C$  (HCl and  $\text{HNO}_3$ )=10% (v/v),  $V(\text{HCl}$  and  $\text{HNO}_3)=5.0\text{mL}$ ,  $25^\circ\text{C}$ )

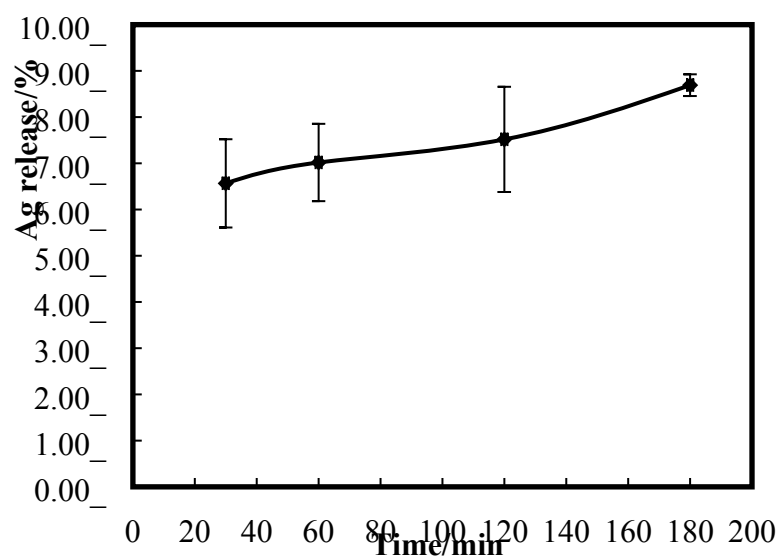

Figure S7 Silver release from the mat during use (V=50mL, m=50mg, 25°C)

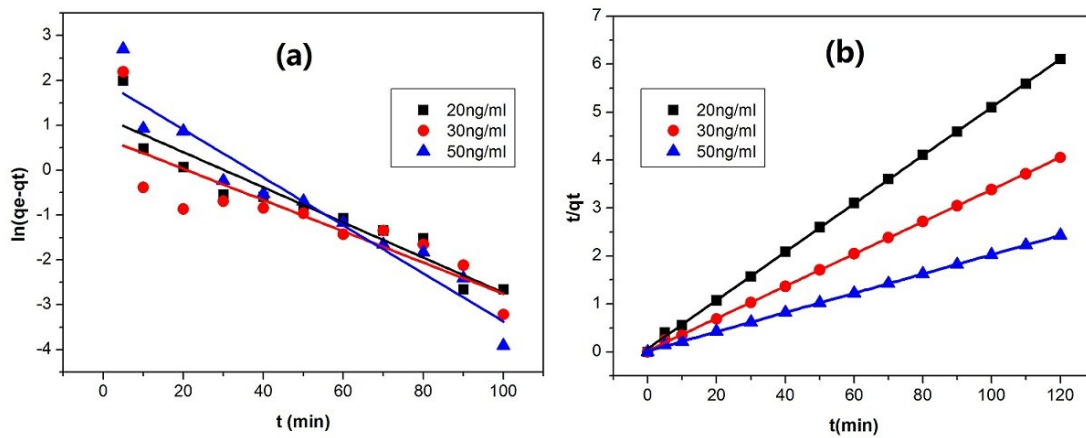

Figure S8 A.pseudo-first-order dynamic equation; B.pseudo-second-order equation  
( $V=50\text{mL}$ ,  $m=50\text{mg}$ ,  $25^\circ\text{C}$ )

## References

- [S1] N.M. Bandaru, N. Reta, H. Dalal, A.V. Ellis, J. Shapter, N.H. Voelcker, *J Hazard Mater*, 2013, 261, 534–541.
- [S2] T.S. Anirudhan, L. Divya, M. Ramachandran, *J Hazard Mater*, 2008, 157, 620-627.
- [S3] R. Li, L. Liu, F. Yang, *J Hazard Mater*, 2014, 280, 20-30.
- [S4] M. Zabihi, A. Ahmadpour, A.H. Asl, *J Hazard Mater*, 2009, 167, 230-236.
- [S5] X. Shen, Q. Wang, W. Chen, Y. Pang, *Appl Surf Sci*, 2014, 317, 1028-1034.
- [S6] B.Y. Song, Y. Eom, T.G. Lee, *Appl Surf Sci*, 2011, 257, 4754-4759.
- [S7] X. Lu, X. Huangfu, X. Zhang, Y. Wang, J. Ma, *Water Res*, 2014, 65, 22-31.
- [S8] H.K. Moghaddam, M. Pakizeh, *J Indust Eng Chem*, 2015, 21, 221-229.
- [S9] Y. Zhang, D. Kogelnig, C. Morgenbesser, A. Stojanovic, F. Jirsa, I. Lichtscheidl-Schultz, R. Krachler, Y. Li, B.K. Keppler, *J Hazard Mater*, 2011, 196, 201-209.
